1 **Aggressiveness trades-off with host generalism in strains of *Phytophthora infestans* (potato and**  
2 **tomato blight): A synthesis of global cross-inoculation data**

3

4 Justin SH Wan<sub>1</sub>\*

5

6 \*Corresponding author

7 <sub>1</sub>Institute of Environmental Health and Ecological Security, School of Environment and Safety

8 Engineering, Jiangsu University, Zhenjiang, China

9 ORCID: 0000-0002-3184-8683

10

11 **Conflict of Interest:** The sole author declares there is no conflict of interest.

12 **Abstract**

13 *Phytophthora infestans* is among the most destructive of plant diseases. Pathogen populations have  
14 varying degrees of host preference among potato and tomato, from no specificity to extreme  
15 specialisation. How host specificity impacts fitness among populations is unclear. Comparing the  
16 aggressiveness of both population types can shed light on the determinants of host specificity in *P.*  
17 *infestans*. A trade-off between generalism and quantitative aggressiveness can explain the variation  
18 among strains. I assessed the existence of such a trade-off by analysing the global cross-inoculation  
19 data on potato and tomato isolates, and tested whether specificity has changed over time. The  
20 synthesis included 44 and 34 data points for potato and tomato isolates respectively. Potato isolates  
21 overall did not prefer their original host significantly more than tomato isolates. However, tomato  
22 isolates became more generalist over the last few decades. High specificity was associated with  
23 significantly greater aggressiveness, and strains from potato can generally infect tomato with similar  
24 aggressiveness and specificity as in reverse. This synthesis reveals several novel insights on the  
25 evolutionary ecology of the blight pathogen, and provides a new way to map and track *P. infestans*  
26 populations. Many unresolved questions on host specificity and aggressiveness remain which are  
27 discussed.

28

29 **Keywords:** late blight, local adaptation, specialisation, fitness, *Solanum tuberosum*, *Solanum*  
30 *lycopersicum*

31 **Introduction**

32 Local adaptation and specialisation to hosts can determine the spatial and temporal evolutionary  
33 dynamics of plant pathogens (Kröner *et al.*, 2017). It is a process where populations under divergent  
34 selection achieve better performance in their habitat of origin than all other possible habitats. In plant  
35 pathogens, local adaptation manifests as specificity for the original host over other potential hosts; and  
36 in the extreme case, host specialisation where the pathogen is only pathogenic to the original host.  
37 Host specificity can be readily quantified in cross-inoculation trials of isolates from different host  
38 species or varieties. Adaptation to hosts, environmental conditions, and fungicide application can  
39 change the genetic composition of disease and thus their epidemiological properties (Cohen, 2002;  
40 Pangga *et al.*, 2011; Engering *et al.*, 2013). Understanding the effects of these drivers is important in  
41 predicting their impacts under climate change (Anderson *et al.*, 2004; Pangga *et al.*, 2011).

42

43 *Phytophthora infestans* de Bary is a globally distributed heterothallic oomycete pathogen on  
44 solanaceous plants. It was the causal agent of the Great Irish Potato Famine that was responsible for  
45 millions of deaths. It is among the most destructive of plant pathogens (Chowdappa *et al.*, 2015; Fry  
46 *et al.*, 2015). The pathogen was formally described in the 1800s (as *Botrytis infestans* by M.J.  
47 Berkeley 1846) and primarily causes disease on potato and tomato (termed late / potato and tomato  
48 blight respectively). Populations of *P. infestans* have been continuously re-emerging through time and  
49 space (Fry *et al.*, 2015). Strains vary dramatically in host specificity among the two host species, from  
50 non-specific generalists (i.e., infects both hosts with equal aggressiveness) to obligate specialists (i.e.,  
51 only infects on one host and zero or near-zero aggressiveness on the other host). The dominance and  
52 turnover of genotypes through time have been as intriguing to investigators as it was impeding to  
53 managers (Fry *et al.*, 2015). The global blight populations have undergone several remarkable  
54 changes throughout their history, from pan-globally dominant lineages (FAM-1 followed by US-1) to  
55 the diversity of genotypes seen today (reviewed in Yoshida *et al.*, 2013; Saville *et al.*, 2016). Adaptive  
56 processes within the pathogen and environmental conditions underlie the severity of the impacts on  
57 each host (Sicard *et al.*, 2007; Fry *et al.*, 2015). The fluxes in the global blight populations are likely  
58 explained by variation in pathogen aggressiveness on hosts (Pariaud *et al.*, 2009). Therefore, a better  
59 understanding of how *P. infestans* adapt and specialise to potato and tomato, and the determinants of  
60 aggressiveness is needed to effectively predict the emergence of disease. *Phytophthora infestans* on  
61 potato and tomato hosts also presents a great opportunity to test whether generalism tends to carry  
62 fitness costs or ‘no-cost’ generalism prevails (Remold, 2012). For practicality, ‘aggressiveness’ is  
63 considered here to be a quantitative measure of pathogenicity that is non-specific to host genotypes, as  
64 defined in Pariaud *et al.* (2009).

65

66 Potato and tomato are traditionally recognised as primary and secondary hosts for *P. infestans*  
67 respectively. Previous reports often found that potato isolates have a higher preference for potato, but

68 tomato isolates are generalist on both hosts (Legard *et al.*, 1995; Michalska *et al.*, 2016; Kröner *et al.*,  
69 2017). Aggressiveness on tomato likely evolved relatively recently during initial invasion from the  
70 centre of origin in the 1800s, because isolates from the native range were non-pathogenic to tomato  
71 (Legard *et al.*, 1995). Blight was long believed to spread from potato to adjacent tomato crops, but not  
72 vice versa (Berg, 1926; Small, 1938; Legard *et al.*, 1995; Cohen, 2002). However, more recently it  
73 has been revealed that transmission regularly occurs from tomato to potato in relatively new strains  
74 such as 13\_A2, US-22, and US-23 (Hu *et al.*, 2012; Frost *et al.*, 2016). The disease is now generally  
75 considered to be as impactful on tomato as it is on potato (Fry *et al.*, 2015; Kröner *et al.*, 2017).

76

77 The history of the disease is particularly thought-provoking owing in part to a long timeline of  
78 observations on host specificity. The earliest cross-inoculation trials done prior to 1910 (from 1847 to  
79 1906) reported no host specificity in isolates from both hosts (Berg, 1926; Oyarzun *et al.*, 1998).  
80 However, this changed in the following period from 1915 when remarkable specificity was frequently  
81 noted either from both potato and tomato isolates or in potato isolates only (including isolates from  
82 Holland, Australia, USA and the UK; Berg, 1926). This was followed by the emergent US-1 lineage  
83 which became dominant from the 1930s. During this period, studies on isolates from different regions  
84 showed the majority had no remarkable specificity, but potato isolates were still more likely host  
85 specific. For example, Wilson and Gallegly (1955) examined isolates from Scotland, the Netherlands,  
86 Canada and the USA, and reported that 8 out of 29 potato isolates were host specific versus 2 out of  
87 16 tomato isolates. Isolates from Israel at the time showed similar proportions (9 out of 25 potato  
88 isolates and 2 out of 25 for tomato isolates; Kedar *et al.*, 1959). Other cross-inoculation studies  
89 conducted during US-1 dominance in Japan (Kishi, 1962), the USA (before 1970, Flier *et al.*, 2003),  
90 and Germany (Günther *et al.*, 1970) also reported little or no specificity. This period was followed by  
91 the emergence of an array of successive lineages from the mid- to late-1980s up to the present where  
92 US-1 becomes either extinct or rare relative to other strains. Studies on surviving (or remaining) US-1  
93 isolates overwhelmingly found host specificity in isolates from either host species within a given site,  
94 and mostly in tomato isolates, but not potato isolates (Erselius *et al.*, 1997; Oyarzun *et al.*, 1998; Vega-  
95 Sanchez *et al.*, 2000; Suassuna *et al.*, 2004; Chen *et al.*, 2009). In North America this pattern is  
96 reversed where the remaining US-1 potato isolates tend to be host specific, but not the tomato isolates  
97 (Goodwin *et al.*, 1995; Legard *et al.*, 1995; Platt, 1999). Other more recently emerged strains may or  
98 may not be host specific, such as US-8 and BR-1 primarily pathogenic on potato (Legard *et al.*, 1995;  
99 Suassuna *et al.*, 2004), US-21 was host specific on tomato (Hu *et al.*, 2012), and EC-1 has low  
100 specificity (Oliva *et al.*, 2010). Importantly, host specificity is a population-level trait so there may be  
101 variation within a lineage. For instance, not all US-8 isolates are potato-specific; a relatively  
102 generalist US-8 was found to be dominant in British Columbia (Canada) on potato and tomato in the  
103 late 1990s (Daayf & Platt, 2003). Different populations of the same lineage can also inhabit the two  
104 hosts at the same sites where their host specificity may vary (e.g. Erselius *et al.*, 1997).

105

106 On the one hand, *P. infestans* strains that are more aggressive on their host should become dominant  
107 (Gisi *et al.*, 2011). For instance, the greater aggressiveness of US-8 is likely an important factor in the  
108 replacement of US-1 in south-western Canada (Miller *et al.*, 1998), and similarly the more aggressive  
109 2\_A1 displaced the less aggressive US-1 in east Africa (Njoroge *et al.*, 2018). In Brazil, the more  
110 aggressive BR-1 partially displaced US-1 from potato, but not tomato (Suassuna *et al.*, 2004). The  
111 dominant 13\_A2 lineage was more aggressive than other lineages, and was demonstrated to  
112 competitively exclude those other strains in the field, which likely explains its quick expansion across  
113 Europe within 3 years (Cooke *et al.*, 2012). On the other hand, strains that can infect a wider range of  
114 hosts, including resistant hosts should also be favoured (Seidl Johnson & Gevens, 2014). The 13\_A2  
115 lineage was also able to infect previously resistant potato cultivars (Cooke *et al.*, 2012). In Taiwan,  
116 the US-11 is aggressive on both potato and tomato and rapidly displaced a potato specific US-1 (Chen  
117 *et al.*, 2009). The generalist US-6 and US-7 lineages similarly replaced the potato specific US-1 in  
118 North America (Hwang *et al.*, 2014). The question then remains: why aren't pathogen populations all  
119 explicitly both highly aggressive and generalist across hosts?

120

121 The relationship between pathogen aggressiveness and fitness is complex. Although the evidence that  
122 strains with greater aggressiveness are advantaged is abundant, conversely there have been  
123 suggestions that the most aggressive strains are not most transmissible because hosts are weakened or  
124 killed too quickly (Pasco *et al.*, 2016; Mariette *et al.*, 2016). This is in line with the 'virulence-  
125 transmission trade-off' hypothesis which posits that high host mortality limits transmission rate (note  
126 that the "virulence" term was used to mean quantitative aggressiveness on the host) (Acevedo *et al.*,  
127 2019). However, in the case of *P. infestans* this hypothesis does not consider the effects of alternate  
128 host habitats, such as tomato plants or wild *Solanum* species (Frost *et al.*, 2016). For instance, a strain  
129 that is extremely aggressive on potato can have lower aggressiveness on tomato to compensate the  
130 lowered transmission rate on potato. Even if high aggressiveness is indeed linked with lower  
131 transmissibility, a trade-off between a generalist strategy (among potato and tomato hosts) versus  
132 aggressiveness could explain the variation in host specificity among *P. infestans* potato and tomato  
133 strains (Thrall & Burdon, 2003; Pariaud *et al.*, 2009). Such a trade-off would be in line with  
134 generalists being 'the jack of all trades but a master of none' and specialists being 'the master of some'  
135 (Remold, 2012). Conversely, it is also evident that strains highly aggressive on both hosts exist (i.e.,  
136 'the master of all' strategy), including some invasive isolates of US-11 (Chen *et al.*, 2009) and 13\_A2  
137 (Chowdappa *et al.*, 2015). Thus our current understanding of the relationship between aggressiveness  
138 and host specificity remains unclear.

139

140 A range of cross-inoculation trials on *P. infestans* from potato and tomato have been conducted over  
141 the past few decades. Meta-analytic approaches can be used to synthesise the evidence to uncover

142 patterns or processes across studies in plant pathology (Madden & Paul, 2011). A quantitative  
143 synthesis of this global data is likely to enable us to draw general conclusions on the relationship  
144 between host specificity and aggressiveness. Also, given the historical population changes associated  
145 with potential major host specificity shifts, a data synthesis can reveal how host specificity is  
146 changing over time. Selection for strains virulent on both hosts can decrease overall host specificity  
147 over time. Hence, the following hypotheses were tested: (1) host specific isolates will be more  
148 aggressive than generalist isolates, (2) potato isolates will be more host specific than tomato isolates,  
149 (3) host specificity will reduce over time, and (4) isolates of the older US-1 lineage will have lower  
150 aggressiveness but more specialised to their host of origin than those of successive lineages.

151

## 152 **Methods**

### 153 *Data collation*

154 To identify studies performing cross-inoculations using potato and tomato isolates of *P. infestans*, I  
155 searched ISI Web of Science (Clarivate) and Google Scholar (<https://scholar.google.com>) in January  
156 2022 using the following terms: 'Phytophthora infestans' AND 'tomato' OR 'potato'. Only trials  
157 conducted on potato and tomato hosts were included. Studies that tested aggressiveness on only one  
158 out of these two hosts were excluded, as well as studies that did not report the host of origin for  
159 isolates (or the host is not determinable based on the isolate information). As such, isolates were  
160 classified either as potato isolates or tomato isolates based on the host of origin. Studies must describe  
161 some quantitative measure of aggressiveness (e.g., lesion size, AUDPC, degree of infection). Thus,  
162 those reporting only qualitative pathogenicity are excluded. Studies that tested the aggressiveness of  
163 multiple isolates were pooled to one data point (for each host of origin) to avoid pseudoreplication.

164

165 From each study, the following were recorded: (1) the host of origin of the isolates (potato or tomato).  
166 Data of isolates from the same host species were pooled; (2) a quantitative measurement of pathogen  
167 aggressiveness on each of potato and tomato under controlled conditions and variance. Most  
168 commonly these are from the inoculation of plant parts or whole plants (e.g., mortality, sporulation  
169 rate, lesion area). Semi-quantitative metrics such as disease severity scores were also accepted as host  
170 specificity was analysed using non-parametric tests. Where more than one measure of aggressiveness  
171 was reported, lesion size on host tissue (converted to lesion growth rate per day) was preferred over  
172 other measures such as AUDPC and plant mortality because lesion size is a key predictor in epidemic  
173 severity in *P. infestans* that was commonly reported (Birhman & Singh, 1995; Pariaud *et al.*, 2009); (3)  
174 original geographical location of the isolate; and (4) time of isolation from hosts (calendar year). The  
175 average isolation year was recorded if data from multiple isolates were pooled.

176

177 The differences in aggressiveness of isolates on the two hosts were standardised using effect size as  
178  $\log_{10}$  response ratio (LRR). Highly negative LRR values ( $< -1$ ) are associated with host specificity

179 (i.e., non-pathogenic on the other host). Conversely, a highly positive LRR ( $> 1$ ) indicates the  
180 pathogen is only aggressive on the other host and therefore the host of origin is likely a sink habitat  
181 (such as the US-8 isolate from tomato in Legard *et al.*, 1995). Lesion growth rate (hereafter ‘LGR’ in  
182 millimetres in length per day) was estimated from the lesion size data in the time following  
183 inoculation. The standardised LGR is used to compare the pathogen aggressiveness on the two hosts  
184 across studies.

185

186 In addition, I compared the host specificity and aggressiveness of US-1 isolates and other lineages.  
187 From all the studies collected from the literature search, studies that tested US-1 isolates were  
188 identified. Part of these studies also tested isolates that are not US-1 along with other isolates (which  
189 were pooled with US-1 in the main analyses). Those were un-pooled and entered as separate entries  
190 comprising of ‘US-1’ and ‘Other’ lineage categories. By limiting the analysis on studies that tested  
191 both US-1 and successive lineages within the same experiment, it allows for a more direct comparison.  
192 Successive lineages are predicted to be more aggressive than US-1 (e.g. Legard *et al.*, 1995) and more  
193 generalist across both hosts (e.g. Chen *et al.*, 2009; Njoroge *et al.*, 2016).

194

#### 195 *Statistical analyses*

196 For the LRR data, a non-parametric bootstrap approach was used to estimate the mean effect sizes and  
197 confidence intervals (95% CI). Bootstrapping is based on the method used in Van den Noortgate and  
198 Onghena (2005) and involves randomly subsampling with replacement over 1000 iterations. This  
199 approach is more suited to cases where many pathogenicity trials did not report the variance (as  
200 compared to a classical meta-analysis approach). Non-parametric bootstrapping does not emphasise  
201 thresholds for statistical significance, but emphasises effect size and confidence intervals (Rillig *et al.*,  
202 2019). Normality in the lesion growth data was checked using quantile-quantile plots (Q-Q plots),  
203 which showed that the distribution of the data was normal (Fig. S1). To test whether specialized  
204 isolates are more aggressive on their host, the relationship between LGR on the original host and the  
205 difference with LGR on other host was analysed using linear regressions. The LGR of US-1 versus  
206 other lineages in subset data was analysed using t-tests. The time and LRR data were not normally  
207 distributed, so median-based linear models (mblm) were used to test the relationships between LRR  
208 and time (year of isolation), and between LRR and aggressiveness on the original host. All analyses  
209 were conducted using R (v.3.6.1, R Core Development Team 2019). Bootstrapping was conducted  
210 using the *boot* package (v. 1.3-22) and the *metaphor* package (v. 2.1-0) was used to calculate effect  
211 sizes. The *mblm* package (v.0.12.1) was used to run the median-based models.

212

#### 213 **Results**

214 This search included 78 host specificity comparisons from 44 studies (Fig. 1). Of these, 31 studies  
215 conducted cross-inoculation trials on both potato and tomato isolates of *P. infestans*. There were a

216 total of 44 and 34 data points for potato and tomato isolates respectively. The isolates are from all  
217 over the globe (Fig. 2). Of the 78 data points, 43 reported lesion size. Ten of the studies tested US-1  
218 isolates along with isolates of more successively emergent lineages (including BR-1, EC-1, US-6, US-  
219 7, US-8, US-11, and other unnamed isolates of A2 mating type). An outlying data point with LRR  
220 value of greater than 1 (i.e., non-pathogenic on the original host but highly aggressive on the other  
221 host) was removed from all analyses (shown in Fig. 3). The trials mainly consisted of leaf  
222 inoculations or detached leaf assays. Data sources and references are provided in the Supplementary  
223 Material (Table S1). The isolation time of pathogen isolates from plants in the field ranged from 1970  
224 to 2017.

225

226 Isolates generally had a modest specificity for their host of origin (LRR estimate -0.26 [-0.09, -0.52]  
227 and -0.18 [-0.01, -0.41] 95% bootstrap CI for potato and tomato isolates respectively), where the  
228 aggressiveness on the other host is 55% and 66% of that on the original host for potato and tomato  
229 isolates, respectively. This difference between host specificity between potato and tomato isolates is  
230 not significant ( $P = 0.81$ ). The host specificity data from each region is summarised in Fig. 3. From  
231 the LGR data, there was a significant positive relationship between aggressiveness on the original host  
232 and the difference in aggressiveness among hosts for potato ( $P < 0.001$ ), but not for tomato, although  
233 this relationship is also strongly positive ( $P = 0.07$ , Table 1; Fig. 4). This overall result is also  
234 supported in the omnibus analysis between host specificity (LRR) versus aggressiveness (LGR) on the  
235 original host ( $P < 0.05$ , Table 2, Fig. 5). These together indicate that host specificity is associated with  
236 greater aggressiveness, and overall the most host specific strains may be up to 3-5 times more  
237 aggressive than generalist strains (Fig. 4). There was no significant relationship between LRR and  
238 isolation time for potato isolates ( $P = 0.54$ ), but for tomato isolates there was a significant positive  
239 relationship ( $P < 0.01$ , Table 3; Fig. 6).

240

241 Focussing on ‘surviving’ isolates of the old US-1 lineage versus other successively emerged lineages,  
242 the sample size available for analysis was relatively low ( $k = 11$  and  $k = 10$  for US-1 and other isolates  
243 respectively) and fewer reporting lesion growth rates ( $k = 7$  and  $k = 6$  respectively). Two US-1 tomato  
244 isolates had extreme specificity for potato and non-aggressive on its original host which were  
245 removed from the analyses (LRR 2.31 and 1.58). There were no significant differences in LRR among  
246 isolates of US-1 and other lineages (LRR -0.22 vs. -0.30 for US-1 and other lineages respectively;  $t =$   
247 -0.30,  $df = 15.94$ ,  $P = 0.77$ ). Furthermore, there was no significant difference in aggressiveness on the  
248 host of origin among US-1 and other successively emergent lineages (LGR 4.12 vs. 3.47 mm per day  
249 respectively;  $t = 0.54$ ,  $df = 2.84$ ,  $P = 0.63$ ). The low availability of data between US-1 and new  
250 isolates means that the results for this comparison should be taken with caution. Nonetheless as the  
251 analyses pertains to a subset of studies that assessed US-1 and other isolates in tandem, it is indicated  
252 that the remaining US-1 isolates are not necessarily less aggressive than those of other lineages.



253

254 **Discussion**

255 The current synthesis of the global data suggests a generalist strategy tends to be costly to  
256 aggressiveness, which can help explain the persistence of host specific strains in the presence of  
257 generalist strains even when both hosts are often abundantly available. *Phytophthora infestans* is a  
258 hemibiotrophic pathogen with a clear necrotrophic phase, so aggressiveness should generally be under  
259 selection in the absence of trade-offs (Jarosz & Davelos, 1995; Montarry *et al.*, 2007). Aggressive  
260 strains often succeed less aggressive ones (e.g. Miller *et al.*, 1998; Cooke *et al.*, 2012), therefore a  
261 lower aggressiveness is likely a fitness cost for the ability to effectively infect both hosts. This finding  
262 is consistent with the first hypothesis that host specific *P. infestans* strains will be more aggressive  
263 than generalist strains. Several factors could potentially explain why generalist strains tend to be  
264 lower in aggressiveness. First, evolutionary theory predicts that specialisation may be associated with  
265 increased fitness in that environment, so naturally specialists would be fitter regardless of any fitness  
266 costs associated with generalism (i.e. ‘the jack of all trades’ strategy; Remold, 2012). Second, genetic  
267 change involved in adaptation to the other host environment may involve fitness costs due to  
268 antagonistic pleiotropy. This includes costs associated with virulence genes to overcome host  
269 resistance factors (Pariaud *et al.*, 2009; Montarry *et al.*, 2007, 2010). Avirulence genes for infecting  
270 potato and tomato are likely independent of each other, so a generalist would need to counter the  
271 resistance factors of both potato and tomato (Oyarzun *et al.*, 1998; Michalska *et al.*, 2016). Third,  
272 specialists should have a lower accumulation of deleterious alleles (Whitlock, 1996). Mutation  
273 accumulation can hinder the competitiveness of a generalist in the presence of specialists (Kawecki,  
274 1994). Virulence is traditionally defined as the ability of a pathogen to overcome host defences,  
275 especially in the gene-for-gene (GFG) model so that high virulence is associated with the ability to  
276 infect more hosts (Laine & Barrès, 2013). This finding is in line with the classic trade-off between  
277 virulence and aggressiveness in the GFG model within a given host species (Thrall & Burdon, 2003).  
278 In the context of this study, a strain that is generalist on both tomato and potato can also be considered  
279 more ‘virulent’ than one that is specialised to one of the hosts.

280

281 This trade-off between generalism and aggressiveness however does not account for the presence of  
282 generalist strains that are equally aggressive as specialist strains, or the co-occurrence of specialists  
283 and generalist strains (even where strains are of the same lineage, Dey *et al.*, 2018). The synthesis  
284 results showed that a portion of generalists (both potato and tomato isolates) has high aggressiveness  
285 equal to the most host specific strains (Fig. 4). An explanation for the relatively low prevalence of  
286 these populations is migration and stochasticity where they have not spread simply because they have  
287 not been introduced to those areas (e.g. due to quarantine measures). Another possible explanation is  
288 the epistatic pleiotropy model where alleles can be conditionally beneficial (Remold, 2012). Under  
289 this model, highly aggressive generalists can arise in a population consisting of normal (less

290 aggressive) generalists or specialists through sexual recombination or selection on cryptic variation.  
291 This would require some level of mutation or sexual reproduction. Alternatively, compensatory  
292 selection against genetic costs of generalism may recover the lost aggressiveness (Pariaud *et al.*,  
293 2009).

294  
295 Interestingly, aggressive generalists often co-occur with other strains, including specialists. The  
296 specific genetic mechanisms for the arising of highly aggressive generalists remain largely unknown.  
297 Nonetheless, fitness is related to a suite of environmental and intrinsic factors including host  
298 availability, competitor strains, fungicide use and intra-seasonal environmental (temporal) variation.  
299 Results from laboratory trials may not always reflect specificity in the field. Finding that highly  
300 aggressive generalist populations are not invariably the most dominant is therefore not unsurprising.  
301 For instance, 13\_A2 and 23\_A1 (genetically identical to US-23) co-occur in northern Africa (Beninal  
302 *et al.*, 2022) and Pakistan (Belkhiter *et al.*, 2019) where both crops are grown in proximity almost  
303 year round. In pathogenicity trials, 13\_A2 is marginally less aggressive than 23\_A1 with a moderate  
304 specificity on potato, while the latter is overall more aggressive on both hosts (Belkhiter *et al.*, 2019).  
305 Yet, the more aggressive ‘generalist’ 23\_A1 is found predominantly on tomato. In Algeria, 23\_A1 is  
306 only dominant during late-season on tomato (Belkhiter *et al.*, 2019; Beninal *et al.*, 2021).  
307 Pathogenicity trials showed that the genetically identical US-23 has specificity similar to that of  
308 23\_A1. Conversely, US-23 has caused major epidemics on both hosts in North America (Daniei *et al.*,  
309 2013). There, US-23 has completely displaced the co-occurring generalist US-22 and a very potato-  
310 specific US-24 (Saville & Ristaino, 2019). While less aggressive than either generalists (US-22 and  
311 US-23), it has been suggested that the specialist US-24 may persist in some areas (i.e. more northern  
312 locations) due to its superior performance under cold conditions (Daniei *et al.*, 2013). The genetically  
313 similar potato-specific US-8 was able to persist mainly at the West Coast of the USA. It has been  
314 suggested that different inoculum (potato seed) sources accounts for its persistence (Saville &  
315 Ristaino, 2019). It is hence evident that specialists may persist in the presence of more aggressive  
316 generalists, and apparently highly aggressive generalists may not always be most successful.

317  
318 Contrary to the second hypothesis that potato isolates will be more host specific, potato and tomato  
319 isolates do not differ significantly in specificity, but there were around twice as many highly host-  
320 specific populations for potato than for tomato by proportion (12 out of 44 cases or 27% for potato,  
321 versus 4 out of 34 cases or 12% with LRR less than -0.5 for tomato; Fig. 5). The reduction in host  
322 specificity of tomato strains over the last few decades is interesting, and only partially supports the  
323 third hypothesis since the specificity of potato isolates did not change over time. Together, these  
324 results generally support the long-held belief that tomato isolates are more generalist than potato  
325 isolates. Possible explanations for the reduction in specificity in tomato isolates include a much  
326 broader resistance complex for potato than tomato (Lebreton & Andrivon, 1998; Oyarzun *et al.*, 1998;

327 Brouwer *et al.*, 2004) or more successful sexual reproduction in tomato isolates. For tomato isolates, a  
328 simpler virulence spectra required to overcome resistance may allow generalism to arise more easily  
329 than potato isolates. A scarce but greater output of successful sexual progeny from viable oospores in  
330 tomato plants than potato (e.g., Cohen *et al.*, 1997; Mayton *et al.*, 2000; Yuen & Anderson, 2013) can  
331 produce prospective aggressive generalist genotypes such as US-11 (Gavino *et al.*, 2000), and reduce  
332 costs of generalism through compensatory mechanisms. It is still much a matter of debate about  
333 whether sexual recombination is less successful in potato than tomato. Moreover, in cold regions  
334 potato isolates could survive on tubers but tomato isolates may need other hosts, so specialisation to  
335 tomato may not be under selection; although tomato isolates could also be reintroduced from other  
336 sources (e.g., seed sources). Differences in regions could not explain the specificity reduction  
337 however as tomato isolates from colder regions (i.e., North America and Europe) did not seem  
338 different in specificity than warmer regions (i.e., Asia, Africa and South America) (LRR -0.21 and -  
339 0.28 respectively). It is clear that the evolutionary forces contributing to host specificity in *P.*  
340 *infestans* are poorly understood, and will require further study before the increasing generalism in  
341 tomato isolates (but not potato) could be explained. Nevertheless, this finding provides critical  
342 information about how the global pathogen populations are interacting and changing with time.  
343 Pathogen transmission from tomato to potato appears likely to increase in the future.

344

345 The question of how specialization to hosts impacts on the evolution of pathogens is an important one  
346 because of the potential for new and unforeseen outbreaks (Dittmar *et al.*, 2016). For example, the  
347 evolution of the sister species *P. mirabilis*, *P. ipomaea*, and *P. phaseoli* closely-related to *P. infestans*  
348 is associated with adaptation and specialization on new host species (Raffaele *et al.*, 2010). In *P.*  
349 *infestans*, complete host specialization to potato or tomato is rare, and pertains to only very few  
350 isolates (such as certain US-8 populations). Most of the time some level of aggressiveness on the  
351 other host is retained (Fig. 3). This may perhaps be due to the relative closeness in physiology among  
352 the two hosts and their global metropolitan nature, ensuring genetic exchange among populations.

353

354 In the current study, lower aggressiveness or higher specificity in US-1 strains was not found. Past  
355 studies often observed the displacement of US-1 by more aggressive strains (Legard *et al.*, 1995; Reis  
356 *et al.*, 2003; Suassuna *et al.*, 2004; Chen *et al.*, 2009). The non-significance difference in  
357 aggressiveness could be due to the low number of data points available in this case. Alternatively  
358 there is a possibility that these studies were testing extant US-1 populations that represent a subset of  
359 survivors, which may be equally aggressive as the newer invading populations. This survivorship  
360 effect may have also been observed in *P. cinnamomi*, where the A2 mating type is the predominant  
361 strain that displaced the less virulent endemic A1 throughout Asia (Arentz, 2017). The remaining  
362 extant *P. cinnamomi* A1 has similar aggressiveness to the A2 strains (Dudzinski *et al.*, 1993; Robin &  
363 Desprez-Loustau, 1998). Comparing tomato and potato isolates of US-1 and those of other lineages

364 under controlled conditions (e.g., competitiveness or pathogenicity under different environmental  
365 conditions; Young *et al.*, 2009) should shed some light on the selection pressures within each host  
366 species.

367

368 An overview of the historical literature on host specificity clearly shows transitions from generalism  
369 to specialism over time. Specialists are favoured in various models, including selection for their  
370 higher aggressiveness, mutation accumulation, and genetic fixation (i.e., under low gene flow and  
371 strong selection, Yeaman & Whitlock, 2011). The modern successive populations are much more  
372 diverse and relatively less clonal than in the past (Drenth *et al.*, 1995), and this is reflected in the  
373 diversity of strains. As these displacements continue and populations shift in properties, it is important  
374 to track these changes. The aggressiveness data on both hosts can be used to plot the strategy space  
375 occupied by isolates relative to others (across the aggressiveness and specificity continuums), and to  
376 track the shifts of lineages within geographical regions (Fig. S2). Aggressiveness can be readily  
377 gauged from cross-inoculation trials, so this method is relatively accessible for managers and other  
378 experts to characterise disease outbreaks and populations. Identifying common principles among  
379 invasions, through the assessment of ecological strategies used by pathogens, would be a key to help  
380 disentangle the complexity of the problem.

381

## 382 **Conclusions**

383 The current synthesis revealed a clear trade-off between generalism and aggressiveness across  
384 *Phytophthora infestans* populations on potato and tomato. Host specificity was associated with greater  
385 aggressiveness in isolates from both hosts. Although the level of specificity among potato and tomato  
386 isolates were not significantly different, tomato isolates tended to become more generalist over the  
387 last few decades. A new and accessible method to map the strategy space occupied by pathogen  
388 populations is presented, that can be used to track how populations are evolving over time and can be  
389 used to characterise new invasions. Future studies on ecological strategies employed by pathogen  
390 populations and the dependencies of host specificity should prove fruitful in predicting the impacts of  
391 epidemics.

392

## 393 **Acknowledgements**

394 The author expresses sincere gratitude to the researchers whose data contributed to this synthesis.

395 Special thanks go to Susan Rutherford for her support and help proofreading the manuscript and

396 Edward Liew for the discussions on *Phytophthora*. Justin SH Wan was supported by the Jiangsu

397 University Science Foundation Fund (20JDG056).

398

399 **References**

- 400 Anderson PK, Cunningham AA, Patel NG, Morales FJ, Epstein PR, Daszak P (2004) Emerging  
401 infectious diseases of plants: pathogen pollution, climate change and agrotechnology drivers.  
402 *Trends in Ecology and Evolution* 19: 535-544.
- 403 Arentz F (2017) *Phytophthora cinnamomi* A1: An ancient resident of New Guinea and Australia of  
404 Gondwanan origin? *Forest Pathology* 47: e12342.
- 405 Acevedo MA, Dilleuth FP, Flick AJ, Faldyn MJ, Elderd BD (2019) Virulence-driven trade-offs in  
406 disease transmission: a meta-analysis. *Evolution* 73: 636-647.
- 407 Belkhiter S, Beninal L, Khedidji H, Krimi A, Bouznad Z (2019) Aggressiveness and host adaptation  
408 of some algerian phytophthora infestans clonal lineage on potato and tomato. *Pakistan*  
409 *Journal of Phytopathology* 31:147-154.
- 410 Beninal L, Bouznad Z, Corbiere R, Belkhiter S, Mabon R, Taoutaou A, Keddad A, Runno-Paurson E,  
411 Andrivon D (2022) Distribution of major clonal lineages EU\_13\_A2, EU\_2\_A1, and  
412 EU\_23\_A1 of *Phytophthora infestans* associated with potato late blight across crop seasons  
413 and regions in Algeria. *Plant Pathology* 71: 458-469.
- 414 Berg A (1926) *Tomato late blight and its relation to late blight of potatoes*. Bulletin 2055,  
415 Agricultural Experiment Station, West Virginia University.
- 416 Birhman RK, Singh BP (1995) Path-coefficient analyses and genetic parameters of the components of  
417 field resistance of potatoes to late blight. *Annals of Applied Biology* 127: 353-362.
- 418 Blandón-Díaz JU, Widmark AK, Hannukkala A, Andersson B, Högberg N, Yuen JE (2012)  
419 Phenotypic variation within a clonal lineage of *Phytophthora infestans* infecting both tomato  
420 and potato in Nicaragua. *Phytopathology* 102: 323-330.
- 421 Brouwer DJ, Jones ES, Clair DA (2004) QTL analysis of quantitative resistance to *Phytophthora*  
422 *infestans* (late blight) in tomato and comparisons with potato. *Genome* 47: 475-492.
- 423 Chen CH, Wang TC, Black L, Sheu ZM, Perez F, Deahl K (2009) Phenotypic and genotypic changes  
424 in the *Phytophthora infestans* population in Taiwan -1991 to 2006. *Journal of*  
425 *Phytopathology* 157: 248-255.
- 426 Chowdappa P, Nirmal Kumar BJ, Madhura S, Mohan SP, Myers KL, Fry WE, Cooke DEL (2015)  
427 Severe outbreaks of late blight on potato and tomato in South India caused by recent  
428 changes in the *Phytophthora infestans* population. *Plant Pathology* 64: 191-199.
- 429 Cohen Y, Farkash S, Reshit Z, Baider A (1997) Oospore production of *Phytophthora infestans* in  
430 potato and tomato leaves. *Phytopathology* 87:191-196.
- 431 Cohen Y (2002) Populations of *Phytophthora infestans* in Israel underwent three major genetic  
432 changes during 1983 to 2000. *Phytopathology* 92: 300-307.
- 433 Cooke DE, Cano LM, Raffaele S, Bain RA, Cooke LR, Etherington GJ, Deahl KL, Farrer RA, Gilroy  
434 EM, Goss EM, Grünwald NJ (2012) Genome analyses of an aggressive and invasive lineage  
435 of the Irish potato famine pathogen. *PLoS Pathogens* 8: e1002940.

- 436 Daayf F, Platt HW. 2003. Differential pathogenicity on potato and tomato of *Phytophthora infestans*  
437 US-8 and US-11 strains isolated from potato and tomato. *Canadian Journal of Plant*  
438 *Pathology* 25: 150-154.
- 439 Danies G, Small I M, Myers K, Childers R, Fry WE (2013) Phenotypic characterization of recent  
440 clonal lineages of *Phytophthora infestans* in the United States. *Plant Disease* 97: 873-881.
- 441 Dey T, Saville A, Myers K, Tewari S, Cooke DE, Tripathy S, Fry WE, Ristaino JB, Guha Roy S.  
442 (2018) Large sub-clonal variation in *Phytophthora infestans* from recent severe late blight  
443 epidemics in India. *Scientific Reports* 8: 4429.
- 444 Dittmar EL, Oakley CG, Conner JK, Gould BA, Schemske DW (2016) Factors influencing the effect  
445 size distribution of adaptive substitutions. *Proceedings of the Royal Society B: Biological*  
446 *Sciences* 283: 20153065.
- 447 Drenth A, Janssen EM, Govers F (1995) Formation and survival of oospores of *Phytophthora*  
448 *infestans* under natural conditions. *Plant Pathology* 44: 86-94.
- 449 Dudzinski MJ, Old KM, Gibbs RJ (1993) Pathogenic variability in Australian isolates of  
450 *Phytophthora cinnamomi*. *Australian Journal of Botany* 41: 721-732.
- 451 Engering A, Hogerwerf L, Slingenbergh J (2013) Pathogen-host-environment interplay and disease  
452 emergence. *Emerging Microbes and Infections* 2: e5.
- 453 Erselius LJ, Vega-Sánchez ME, Rodríguez AM, Bastidas O, Hohl HR, Ojiambo PS, Mukalazi J,  
454 Vermeulen T, Fry WE, Forbes GA (1997) Host specificity of *Phytophthora infestans* on  
455 tomato and potato in Uganda and Kenya. *CIP Program Report* 1998, 49-55.
- 456 Flier WG, Van den Bosch GB, Turkensteen LJ (2003) Epidemiological importance of *Solanum*  
457 *sisymbriifolium*, *S. nigrum* and *S. dulcamara* as alternative hosts for *Phytophthora infestans*.  
458 *Plant Pathology* 52: 595-603.
- 459 Frenkel O, Brewer, MT, Milgroom MG (2010) Variation in pathogenicity and aggressiveness of  
460 *Erysiphe necator* from different *Vitis* spp. and geographic origins in the eastern United  
461 States. *Phytopathology* 100: 1185-1193.
- 462 Frost KE, Seidl Johnson AC, Gevens AJ (2016) Survival of isolates of the US-22, US-23, and US-24  
463 clonal lineages of *Phytophthora infestans* by asexual means in tomato seed at cold  
464 temperatures. *Plant Disease* 100: 180-187.
- 465 Fry WE, Goodwin SB (1997) Re-emergence of potato and tomato late blight in the United States.  
466 *Plant Disease* 81: 1349-1357.
- 467 Fry WE, Birch PR, Judelson HS, Grünwald NJ, Danies G, Everts KL, Gevens AJ, Gugino BK,  
468 Johnson DA, Johnson SB, McGrath MT (2015) Five reasons to consider *Phytophthora*  
469 *infestans* a reemerging pathogen. *Phytopathology* 105: 966-981.
- 470 Garry G, Forbes GA, Salas A, Santa Cruz M, Perez WG, Nelson RJ (2005) Genetic diversity and host  
471 differentiation among isolates of *Phytophthora infestans* from cultivated potato and wild  
472 Solanaceous hosts in Peru. *Plant Pathology* 54: 740-748.

- 473 Gavino PD, Smart CD, Sandrock RW, Miller JS, Hamm PB, Lee TY, Davis RM, Fry WE (2000)  
474 Implications of sexual reproduction for *Phytophthora infestans* in the United States:  
475 Generation of an aggressive lineage. *Plant Disease* 84:731-735.
- 476 Ghimire SR, Hyde KD, Hodgkiss IJ, Shaw DS, Liew ECY (2003) Variations in the *Phytophthora*  
477 *infestans* population in Nepal as revealed by nuclear and mitochondrial DNA  
478 polymorphisms. *Phytopathology* 93: 236–243.
- 479 Gisi U, Walder F, Resheat-Eini Z, Edel D, Sierotzki H (2011) Changes of genotype, sensitivity and  
480 aggressiveness in *Phytophthora infestans* isolates collected in European countries in 1997,  
481 2006 and 2007. *Journal of Phytopathology* 159: 223-232.
- 482 Goodwin SB, Sujkowski LS, Fry WE (1995) Rapid evolution of pathogenicity within clonal lineages  
483 of the potato late blight disease fungus. *Phytopathology* 85: 669-676.
- 484 Goodwin SB, Smart CD, Sandrock RW, Deahl KL, Punja ZK, Fry WE (1998) Genetic change within  
485 populations of *Phytophthora infestans* in the United States and Canada during 1994 to 1996:  
486 Role of migration and recombination. *Phytopathology* 88: 939-949.
- 487 Günther E, Eggert D, Grümmer G (1970) Resistance of tomatoes to late blight (*Phytophthora*  
488 *infestans*). *Annals of Applied Biology* 65: 255-262.
- 489 Hu CH, Perez FG, Donahoo R, McLeod A, Myers K, Ivors K, Secor G, Roberts PD, Deahl KL, Fry  
490 WE, Ristaino JB (2012) Recent genotypes of *Phytophthora infestans* in the eastern United  
491 States reveal clonal populations and reappearance of mefenoxam sensitivity. *Plant Disease*  
492 96: 1323-1330.
- 493 Hwang YT, Wijekoon C, Kalischuk M, Johnson D, Howard R, Prüfer D, Kawchuk L (2014)  
494 Evolution and management of the Irish potato famine pathogen *Phytophthora infestans* in  
495 Canada and the United States. *American Journal of Potato Research* 91: 579-593.
- 496 Jarosz AM, Davelos AL (1995) Effects of disease in wild plant populations and the evolution of  
497 pathogen aggressiveness. *New Phytologist* 129: 371-387.
- 498 Kato M, Mizubuti ES, Goodwin SB, Fry WE (1997) Sensitivity to protectant fungicides and  
499 pathogenic fitness of clonal lineages of *Phytophthora infestans* in the United States.  
500 *Phytopathology* 87: 973-978.
- 501 Kawecki TJ (1994) Accumulation of deleterious mutations and the evolutionary cost of being a  
502 generalist. *The American Naturalist* 144: 833-838.
- 503 Kedar N, Rotem J, Wahl I (1959) Physiologic specialization of *Phytophthora infestans* in Israel.  
504 *Phytopathology* 49: 675-679.
- 505 Kishi K (1962) Studies on the physiological specialization of *Phytophthora infestans* on tomatoes.  
506 *Japanese Journal of Phytopathology* 27: 180-188.
- 507 Komsta L, Komsta ML. 2013. Package ‘*mblm*’. Available online: [https://cran.r-](https://cran.r-project.org/web/packages/mblm/index.html)  
508 [project.org/web/packages/mblm/index.html](https://cran.r-project.org/web/packages/mblm/index.html) (accessed April 2022).

- 509 Kröner A, Mabon R, Corbière R, Montarry J, Andrivon D (2017) The coexistence of generalist and  
510 specialist clonal lineages in natural populations of the Irish Famine pathogen *Phytophthora*  
511 *infestans* explains local adaptation to potato and tomato. *Molecular Ecology* 26: 1891-1901.
- 512 Laine AL, Barrès B (2013) Epidemiological and evolutionary consequences of life-history trade-offs  
513 in pathogens. *Plant Pathology* 62: 96-105.
- 514 Lebreton L, Andrivon D (1998) French isolates of *Phytophthora infestans* from potato and tomato  
515 differ in phenotype and genotype. *European Journal of Plant Pathology* 104: 583-594.
- 516 Legard DE, Lee TY, Fry WE (1995) Pathogenic specialisation in *Phytophthora infestans*:  
517 aggressiveness on tomato. *Phytopathology* 85: 1356-1361.
- 518 Madden LV, Paul PA (2011) Meta-analysis for evidence synthesis in plant pathology: An overview.  
519 *Phytopathology* 101: 16-30.
- 520 Mariette N, Mabon R, Corbiere R, Boulard F, Glais I, Marquer B, Pasco C, Montarry J, Andrivon D  
521 (2016) Phenotypic and genotypic changes in French populations of *Phytophthora infestans*:  
522 are invasive clones the most aggressive? *Plant Pathology* 65: 577-586.
- 523 Mayton H, Smart CD, Moravec BC, Mizubuti ES, Muldoon AE, Fry WE (2000) Oospore survival and  
524 pathogenicity of single oospore recombinant progeny from a cross involving US-17 and US-  
525 8 genotypes of *Phytophthora infestans*. *Plant Disease* 84: 1190-1196.
- 526 Michalska AM, Sobkowiak S, Flis B, Zimnoch-Guzowska E (2016) Virulence and aggressiveness of  
527 *Phytophthora infestans* isolates collected in Poland from potato and tomato plants identified  
528 no strong specificity. *European Journal of Plant Pathology* 144: 325-336.
- 529 Miller JS, Johnson DA, Hamm PB (1998) Aggressiveness of isolates of *Phytophthora infestans* from  
530 the Columbia Basin of Washington and Oregon. *Phytopathology* 88: 190-197.
- 531 Mills WR (1940) *Phytophthora infestans* on tomato. *Phytopathology* 30: 830-839.
- 532 Montarry J, Corbiere R, Lesueur S, Glais I, Andrivon D (2006) Does selection by resistant hosts  
533 trigger local adaptation in plant-pathogen systems? *Journal of Evolutionary Biology* 19:  
534 522-531.
- 535 Montarry J, Corbiere R, Andrivon D (2007) Is there a trade-off between aggressiveness and  
536 overwinter survival in *Phytophthora infestans*? *Functional Ecology* 21: 603-610.
- 537 Montarry J, Hamelin FM, Glais I, Corbière R, Andrivon D (2010) Fitness costs associated with  
538 unnecessary virulence factors and life history traits: evolutionary insights from the potato  
539 late blight pathogen *Phytophthora infestans*. *BMC Evolutionary Biology* 10: 1-9.
- 540 Nishikawa K, Kinjo AR (2018) Mechanism of evolution by genetic assimilation: Equivalence and  
541 independence of genetic mutation and epigenetic modulation in phenotypic expression.  
542 *Biophysical Reviews* 10: 667-676.
- 543 Njoroge AW, Tusiime G, Forbes GA, Yuen JE (2016) Displacement of US-1 clonal lineage by a new  
544 lineage of *Phytophthora infestans* on potato in Kenya and Uganda. *Plant Pathology* 65: 587-  
545 592.



- 546 Oliva RF, Kroon LP, Chacón G, Flier WG, Ristaino JB, Forbes GA (2010) *Phytophthora andina* sp.  
547 nov., a newly identified heterothallic pathogen of solanaceous hosts in the Andean highlands.  
548 *Plant Pathology* 59: 613-625.
- 549 Oyarzun PJ, Pozo A, Ordoñez ME, Doucett K, Forbes GA (1998) Host specificity of *Phytophthora*  
550 *infestans* on tomato and potato in Ecuador. *Phytopathology* 88: 265-271.
- 551 Palti J, Netzer D (1963) Development and control of *Phytophthora infestans* (Mont.) De By. under  
552 semi-arid conditions in Israel. *Phytopathologia Mediterranea* 1: 265-274.
- 553 Pangga IB, Hanan J, Chakraborty S (2011) Pathogen dynamics in a crop canopy and their evolution  
554 under changing climate. *Plant Pathology* 60: 70-81.
- 555 Pariaud B, Ravigné V, Halkett F, Goyeau H, Carlier J, Lannou C (2009) Aggressiveness and its role  
556 in the adaptation of plant pathogens. *Plant Pathology* 58: 409-424.
- 557 Pasco C, Montarry J, Marquer B, Andrivon D (2016) And the nasty ones lose in the end: foliar  
558 pathogenicity trades off with asexual transmission in the Irish famine pathogen  
559 *Phytophthora infestans*. *New Phytologist* 209: 334-342.
- 560 Platt HW (1999) Response of Solanaceous cultivated plants and weed species to inoculation with A1  
561 or A2 mating type strains of *Phytophthora infestans*. *Canadian Journal of Plant Pathology*  
562 21: 301-307.
- 563 Raffaele S, Farrer RA, Cano LM, Studholme DJ, MacLean D, Thines M, Jiang RH, Zody MC,  
564 Kunjeti SG, Donofrio NM *et al.* (2010) Genome evolution following host jumps in the Irish  
565 potato famine pathogen lineage. *Science* 330: 1540-1543.
- 566 Reddick D, Crosier W (1933) Biological specialization in *Phytophthora infestans*. *American Potato*  
567 *Journal* 10: 129-134.
- 568 Reis A, Smart CD, Fry WE, Maffia LA, Mizubuti ES (2003) Characterization of isolates of  
569 *Phytophthora infestans* from southern and southeastern Brazil from 1998 to 2000. *Plant*  
570 *Disease* 87: 896-900.
- 571 Remold S. 2012. Understanding specialism when the jack of all trades can be the master of all.  
572 *Proceedings of the Royal Society B: Biological Sciences* 279: 4861–4869.
- 573 Rillig MC, Ryo M, Lehmann A, Aguilar-Trigueros CA, Buchert S, Wulf A, Iwasaki A, Roy J, Yang  
574 G (2019) The role of multiple global change factors in driving soil functions and microbial  
575 biodiversity. *Science* 366: 886-890.
- 576 Robin C, Desprez-Loustau M (1998) Testing variability in pathogenicity of *Phytophthora cinnamomi*.  
577 *European Journal of Plant Pathology* 104: 465–475.
- 578 Rubin E, Baider A, Cohen Y (2001) *Phytophthora infestans* produces oospores in fruits and seeds of  
579 tomato. *Phytopathology* 91: 1074-1080.
- 580 Saville AC, Martin MD, Ristaino JB (2016) Historic late blight outbreaks caused by a widespread  
581 dominant lineage of *Phytophthora infestans* (Mont.) de Bary. *PLoS ONE* e0168381.

- 582 Saville A, Ristaino JB (2019) Genetic structure and subclonal variation of extant and recent US  
583 lineages of *Phytophthora infestans*. *Phytopathology* 109: 1614-1627.
- 584 Seidl Johnson AC, Gevens AJ (2014) Investigating the host range of the US-22, US-23, and US-24  
585 clonal lineages of *Phytophthora infestans* on solanaceous cultivated plants and weeds. *Plant*  
586 *Disease* 98: 754-760.
- 587 Sicard D, Pennings PS, Grandclément C, Acosta J, Kaltz O, Shykoff JA (2007) Specialization and  
588 local adaptation of a fungal parasite on two host plant species as revealed by two fitness  
589 traits. *Evolution* 61: 27-41.
- 590 Small T (1938) The relation between potato blight and tomato blight. *Annals of Applied Biology* 25:  
591 271-276.
- 592 Suassuna ND, Maffia LA, Mizubuti ES (2004) Aggressiveness and host specificity of Brazilian  
593 isolates of *Phytophthora infestans*. *Plant Pathology* 53: 405-413.
- 594 Thrall PH, Burdon JJ (2003) Evolution of virulence in a plant host-pathogen metapopulation. *Science*  
595 299: 1735-1737.
- 596 Van Den Noortgate W, Onghena P (2005) Parametric and nonparametric bootstrap methods for meta-  
597 analysis. *Behavior Research Methods* 37: 11-22.
- 598 Vartanian VG, Endo RM (1985) Overwintering hosts, compatibility types, and races of *Phytophthora*  
599 *infestans* on tomato in southern California. *Plant Disease* 69: 516-519.
- 600 Vega-Sánchez ME, Erselius LJ, Rodriguez AM, Bastidas O, Hohl HR, Ojiambo PS, Mukalazi J,  
601 Vermeulen T, Fry WE, Forbes GA (2000) Host adaptation to potato and tomato within the  
602 US- 1 clonal lineage of *Phytophthora infestans* in Uganda and Kenya. *Plant Pathology* 49:  
603 531-539.
- 604 Wang X, El Hadrami A, Adam L, Daayf F (2004) US-1 and US-8 genotypes of *Phytophthora*  
605 *infestans* differentially affect local, proximal and distal gene expression of phenylalanine  
606 ammonia-lyase and 3-hydroxy, 3-methylglutaryl CoA reductase in potato leaves.  
607 Physiological and Molecular *Plant Pathology* 65: 157-167.
- 608 Whitlock MC (1996) The red queen beats the jack-of-all-trades: the limitations on the evolution of  
609 phenotypic plasticity and niche breadth. *The American Naturalist* 148: S65-S77.
- 610 Wilson JB, Gallegly ME (1955) The interrelationships of potato and tomato races of *Phytophthora*  
611 *infestans*. *Phytopathology* 45: 473-476.
- 612 Yeaman S, Whitlock MC (2011) The genetic architecture of adaptation under migration-selection  
613 balance. *Evolution* 65: 1897-1911.
- 614 Yoshida K, Schuenemann VJ, Cano LM, Pais M, Mishra B, Sharma R, Lanz C, Martin FN, Kamoun  
615 S, Krause J, *et al.* (2013) The rise and fall of the *Phytophthora infestans* lineage that  
616 triggered the Irish potato famine. *eLife* 2: e00731.

- 617 Young GK, Cooke LR, Kirk WW, Tumbalam P, Perez FM, Deahl KL (2009) Influence of  
618 competition and host plant resistance on selection in *Phytophthora infestans* populations in  
619 Michigan, USA and in Northern Ireland. *Plant Pathology* 58: 703-714.
- 620 Yuen JE, Andersson B (2013) What is the evidence for sexual reproduction of *Phytophthora infestans*  
621 in Europe? *Plant Pathology* 62: 485-491.

622 **Table 1**

623 Aggressiveness as defined by lesion growth rate (LGR in millimetres per day) on host of origin versus difference in aggressiveness on the other host (defined  
 624 as LGR on host of origin minus LGR on other host). The data was collated from cross-inoculation trials conducted on potato and tomato isolates of  
 625 *Phytophthora infestans* ( $k = 24$  and  $k = 19$  respectively). Bold values indicate statistically significant effects (at  $P < 0.05$ ).  
 626

| Source                        | Estimate | SE   | d.f. | t     | P                |
|-------------------------------|----------|------|------|-------|------------------|
| Potato isolates               |          |      |      |       |                  |
| Intercept                     | -0.72    | 0.55 | 22   | -1.32 | 0.20             |
| Aggressiveness host of origin | 0.55     | 0.14 |      | 3.80  | <b>&lt;0.001</b> |
| Tomato isolates               |          |      |      |       |                  |
| Intercept                     | -0.33    | 0.68 | 17   | -0.49 | 0.63             |
| Aggressiveness host of origin | 0.36     | 0.18 |      | 1.94  | 0.07             |

627 **Table 2**

628 Aggressiveness as defined by lesion growth rate (LGR in millimetres per day) on host of origin versus effect size (LRR) for all *Phytophthora infestans*  
 629 isolates ( $k = 68$ ). Bold values indicate statistically significant effects ( $P < 0.05$ ).

630

| Source    | Estimate | Median absolute deviation | V   | P           |
|-----------|----------|---------------------------|-----|-------------|
| Intercept | -0.00    | 0.21                      | 470 | 0.77        |
| LRR       | -0.03    | 0.10                      | 316 | <b>0.04</b> |

631 **Table 3**

632 Year of isolation (Calendar year) versus effect size (LRR) for *Phytophthora infestans* potato ( $k = 40$ ) and tomato ( $k = 32$ ) isolates. Bold values indicate  
 633 statistically significant effects (at  $P < 0.05$ ).

634

| Source          | Estimate | Median absolute deviation | V   | <i>P</i>     |
|-----------------|----------|---------------------------|-----|--------------|
| Potato isolates |          |                           |     |              |
| Intercept       | -0.41    | 10.29                     | 448 | 0.62         |
| Year            | 0.00     | 0.01                      | 328 | 0.54         |
| Tomato isolates |          |                           |     |              |
| Intercept       | -17.00   | 26.98                     | 126 | <b>0.009</b> |
| Year            | 0.01     | 0.01                      | 402 | <b>0.009</b> |

635 **Figure Captions**

636 **Fig. 1**

637 Flow diagram of the literature search and the screening process, detailing the number of studies excluded  
638 during screening up to the final number of studies included.

639

640 **Fig. 2**

641 World map detailing the locations of *Phytophthora infestans* potato and tomato populations tested in cross-  
642 inoculation trials. Symbols with lighter shades represent imprecise locations specified to the general region  
643 only. Geographically distant populations tested within the same study are joined by dotted lines.

644

645 **Fig. 3**

646 Summary median and quantiles for host specificity (effect size LRR) among potato and tomato isolates of  
647 *Phytophthora infestans* across continental regions (where  $k$  is the sample size). More negative LRR values  
648 indicate higher specificity. Very negative values (such as  $< -1$ ) are associated with specialisation to the  
649 original host. Populations with very positive values are specialised on the other host and are considered  
650 outliers (indicated by the grey arrow). A value of zero indicates equal aggressiveness on both hosts where  
651 there is no specificity.

652

653 **Fig. 4**

654 Relationship between aggressiveness versus the difference in aggressiveness among hosts in *Phytophthora*  
655 *infestans* potato and tomato isolates. Aggressiveness is defined as lesion growth rate on host tissue (in  
656 millimetres per day). A greater difference in aggressiveness among hosts indicates greater specificity. Potato  
657 isolates are indicated in brown (solid line and circles) and tomato isolates are indicated in red (dashed line and  
658 triangles).

659

660 **Fig. 5**

661 Relationship between host specificity (LRR) and aggressiveness on the original host (LGR) for potato and  
662 tomato isolates.

663

664

665 **Fig. 6**

666 Relationship between host preference (LRR) versus year of isolation in *Phytophthora infestans* a) potato and b)  
667 tomato isolates. More negative LRR values are associated with greater specificity for the host of origin than  
668 the other host.

669 **Supplementary material captions**

670 **Figure S1**

671 Quantile-quantile plots for the lesion growth rate data of *Phytophthora infestans* from a) potato and b) tomato  
672 (LGR on the original host).

673

674 **Figure S2**

675 Relative strategy space occupied by some populations of *Phytophthora infestans* lineages plotted onto Figure  
676 4. Aggressiveness is defined as lesion growth rate on hosts (mm per day) plotted against the difference in  
677 aggressiveness on the other host. A greater difference in aggressiveness among hosts indicates greater  
678 specificity. Potato isolates are in black (circles) and tomato isolates are in grey (triangles). References to  
679 isolates are shown below the figure.

680

681 **Table S1**

682 List of studies and data used in the synthesis of *Phytophthora infestans* host specificity and aggressiveness of  
683 potato and tomato isolates.

684



Fig. 1

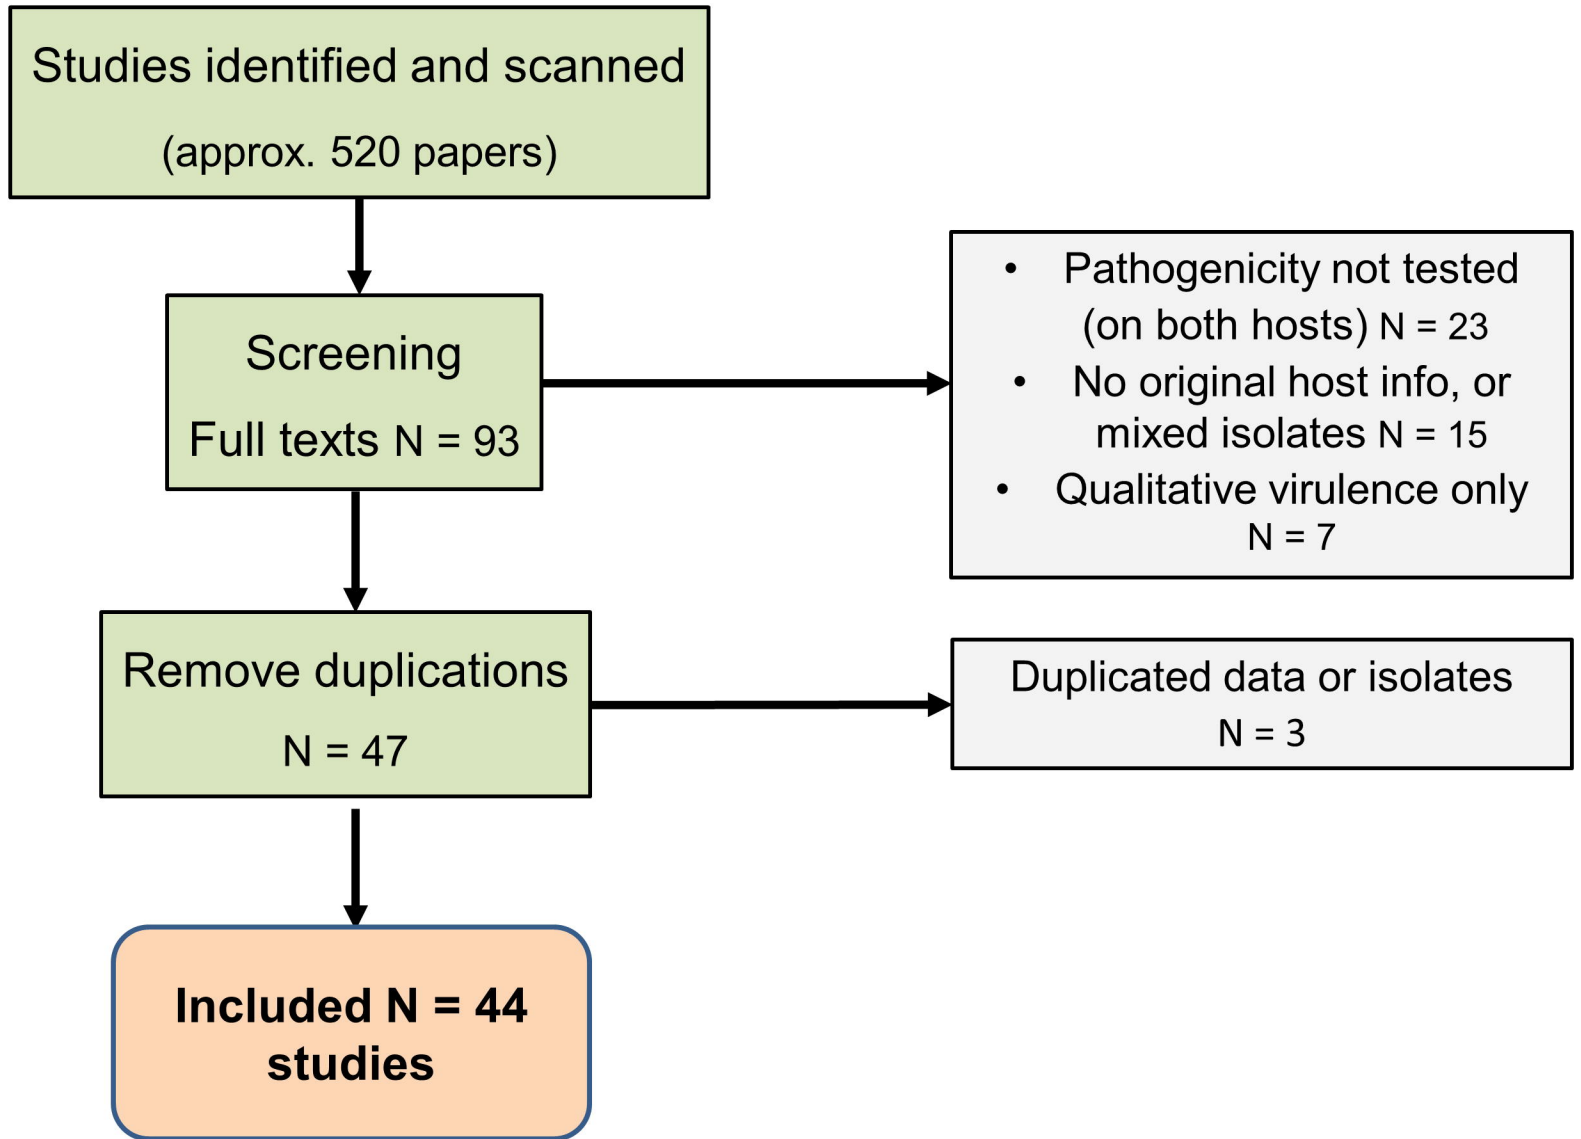

Fig. 2

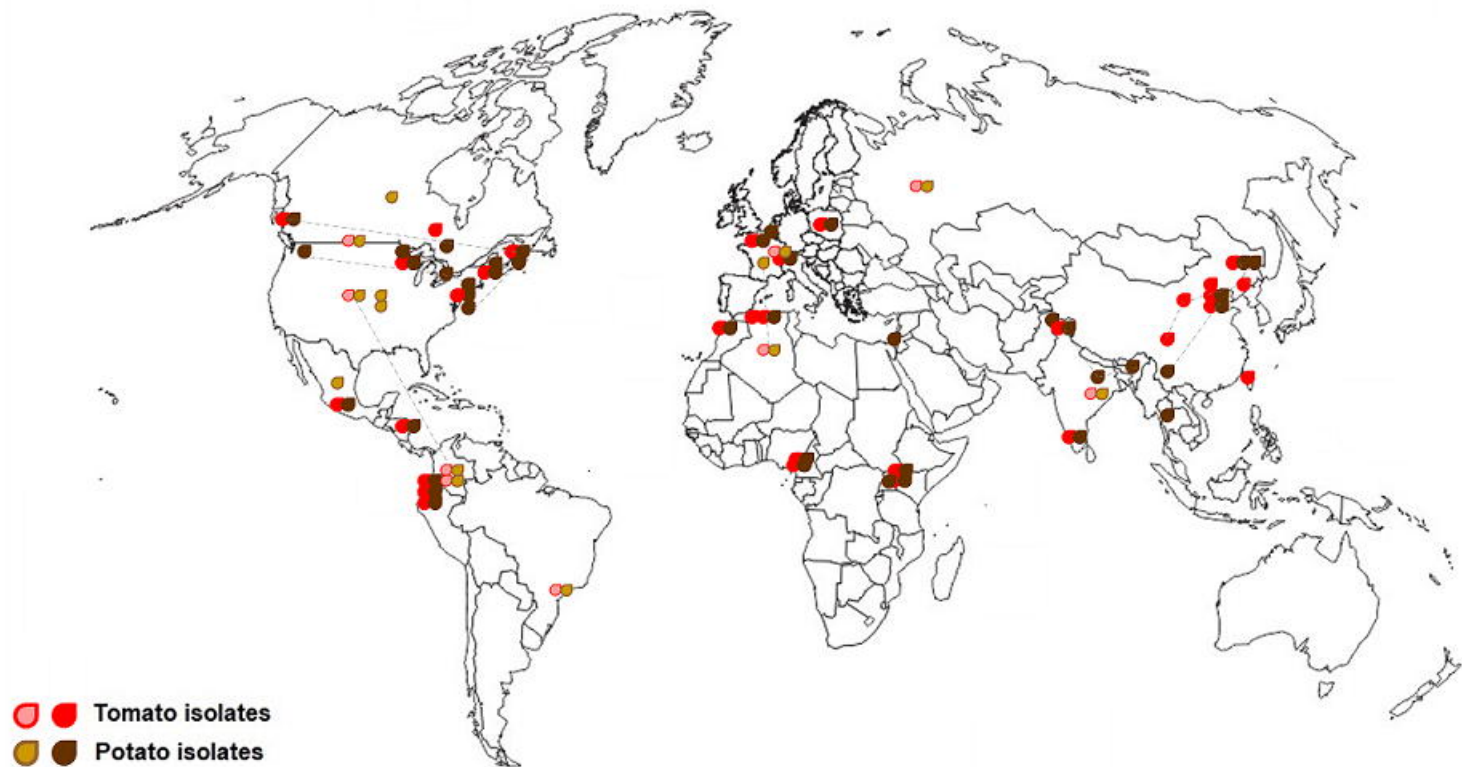

Fig. 3

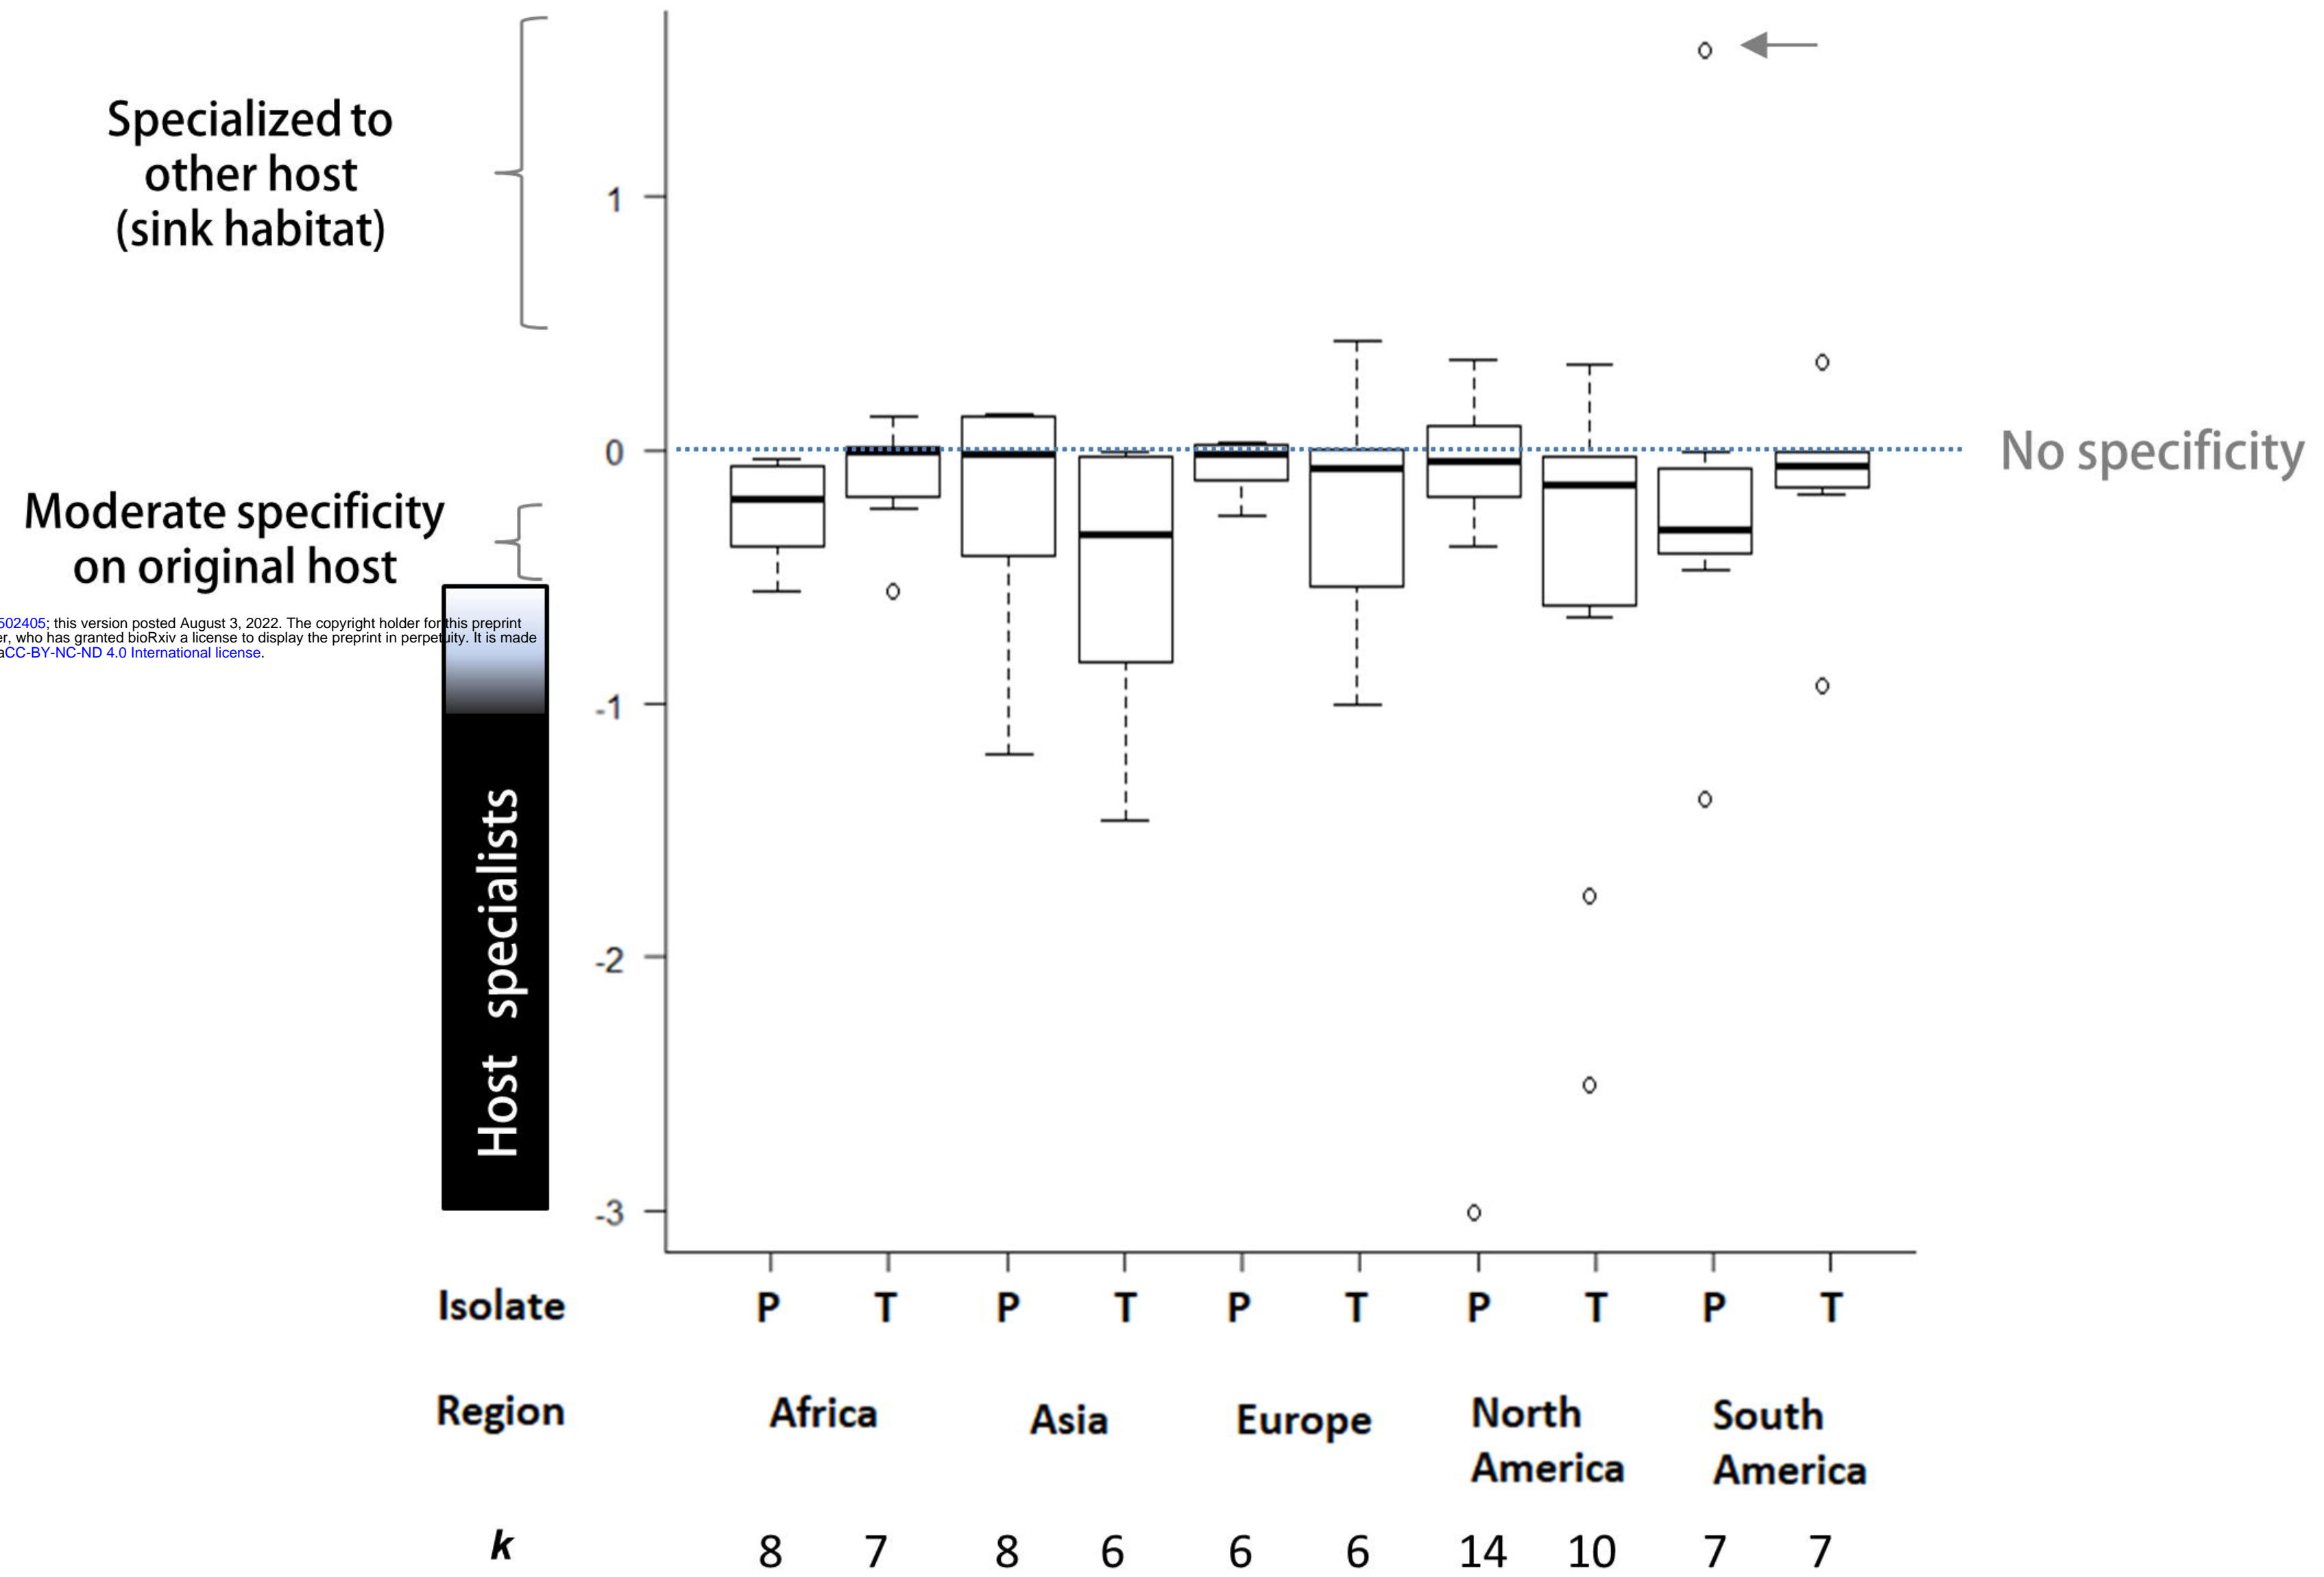

bioRxiv preprint doi: <https://doi.org/10.1101/2022.08.01.502405>; this version posted August 3, 2022. The copyright holder for this preprint (which was not certified by peer review) is the author/funder, who has granted bioRxiv a license to display the preprint in perpetuity. It is made available under aCC-BY-NC-ND 4.0 International license.

**Fig. 4**

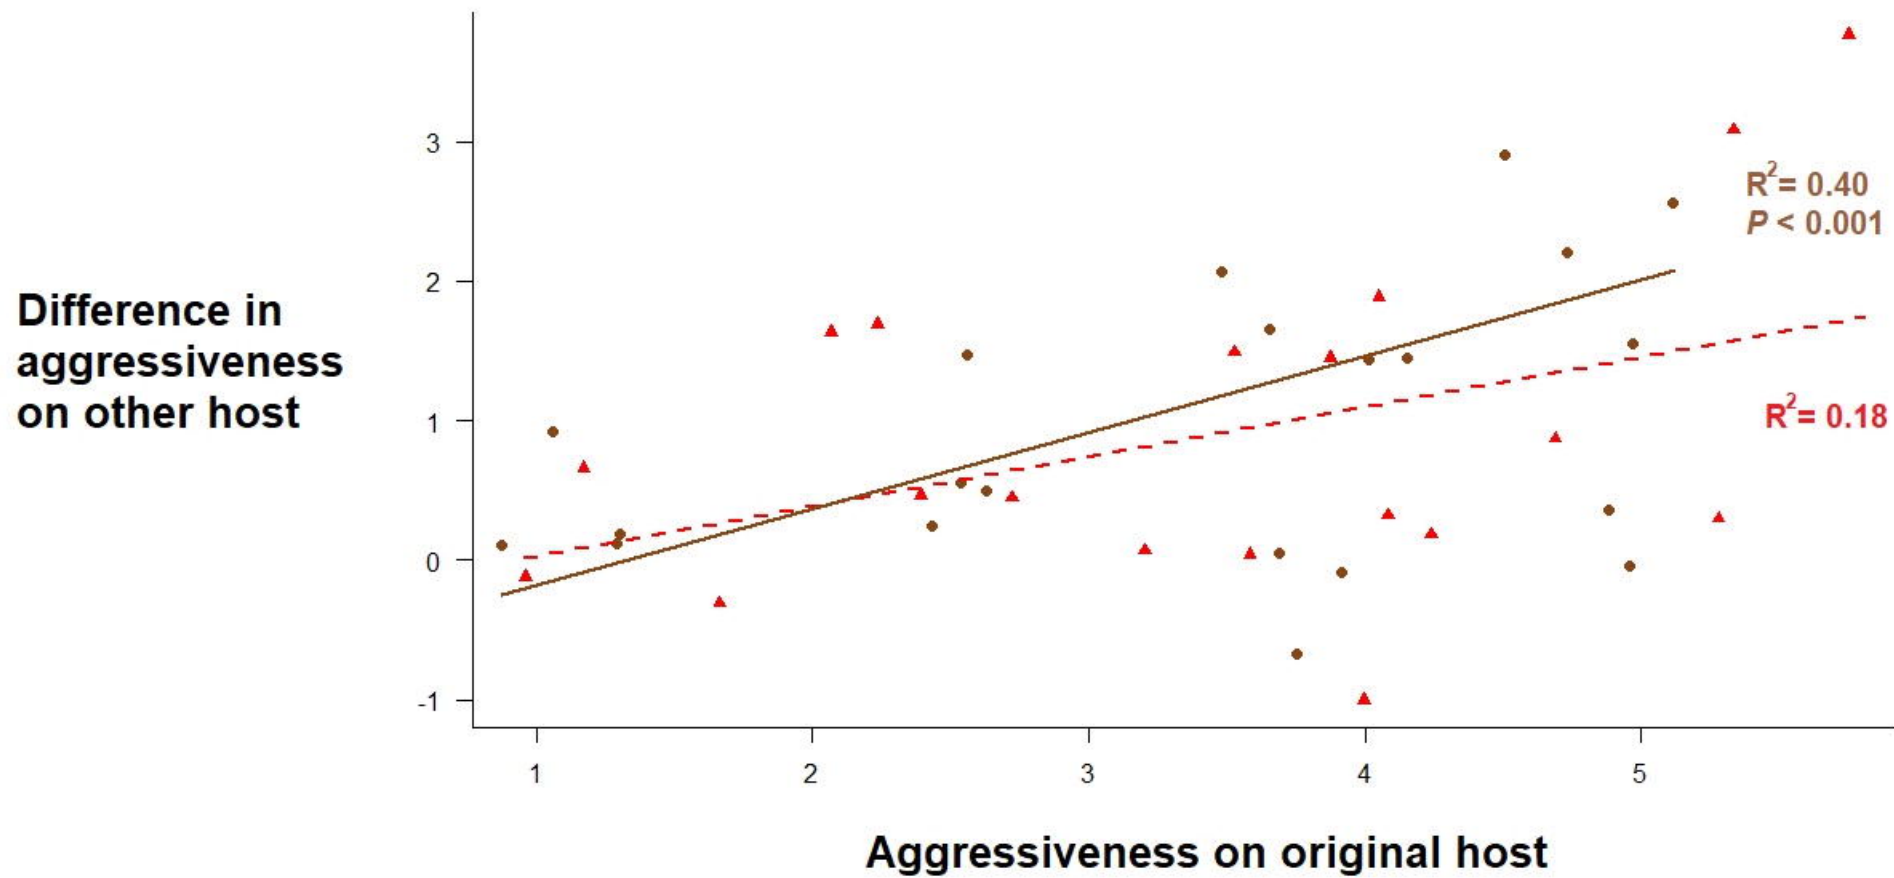

Fig. 5

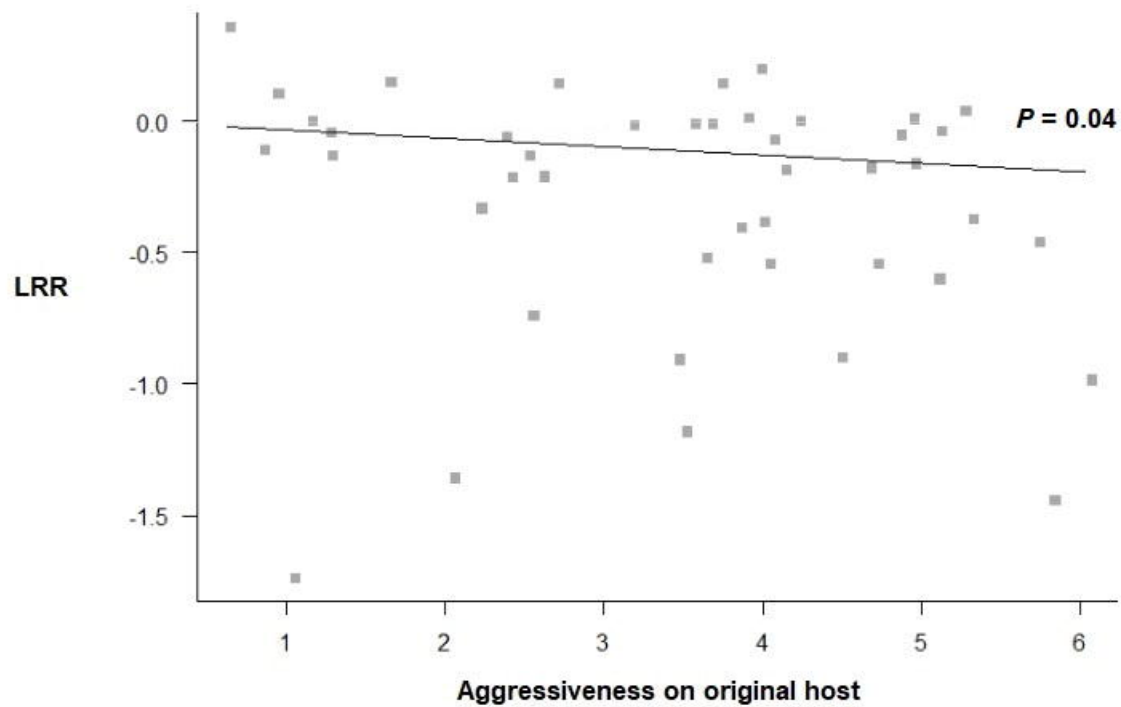

Fig. 5

a)

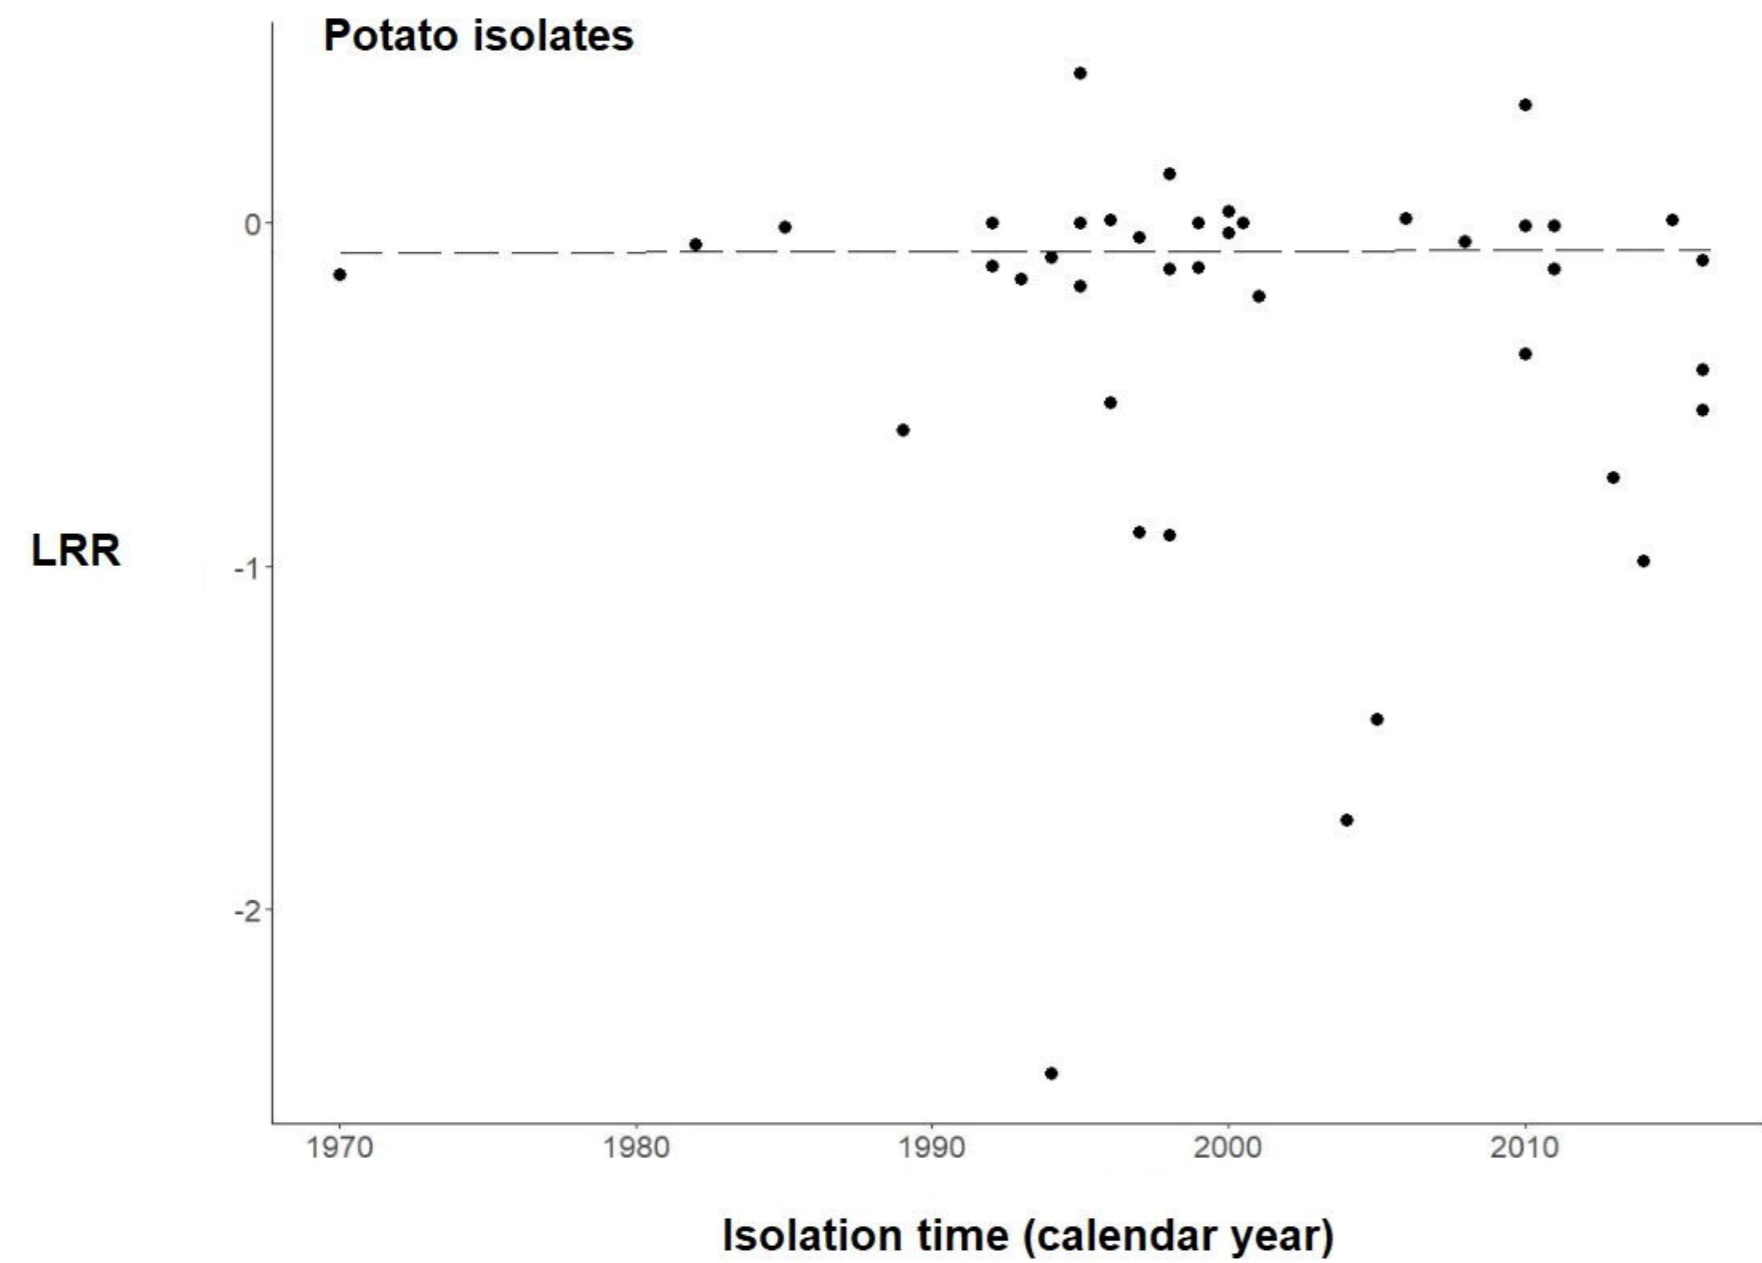

b)

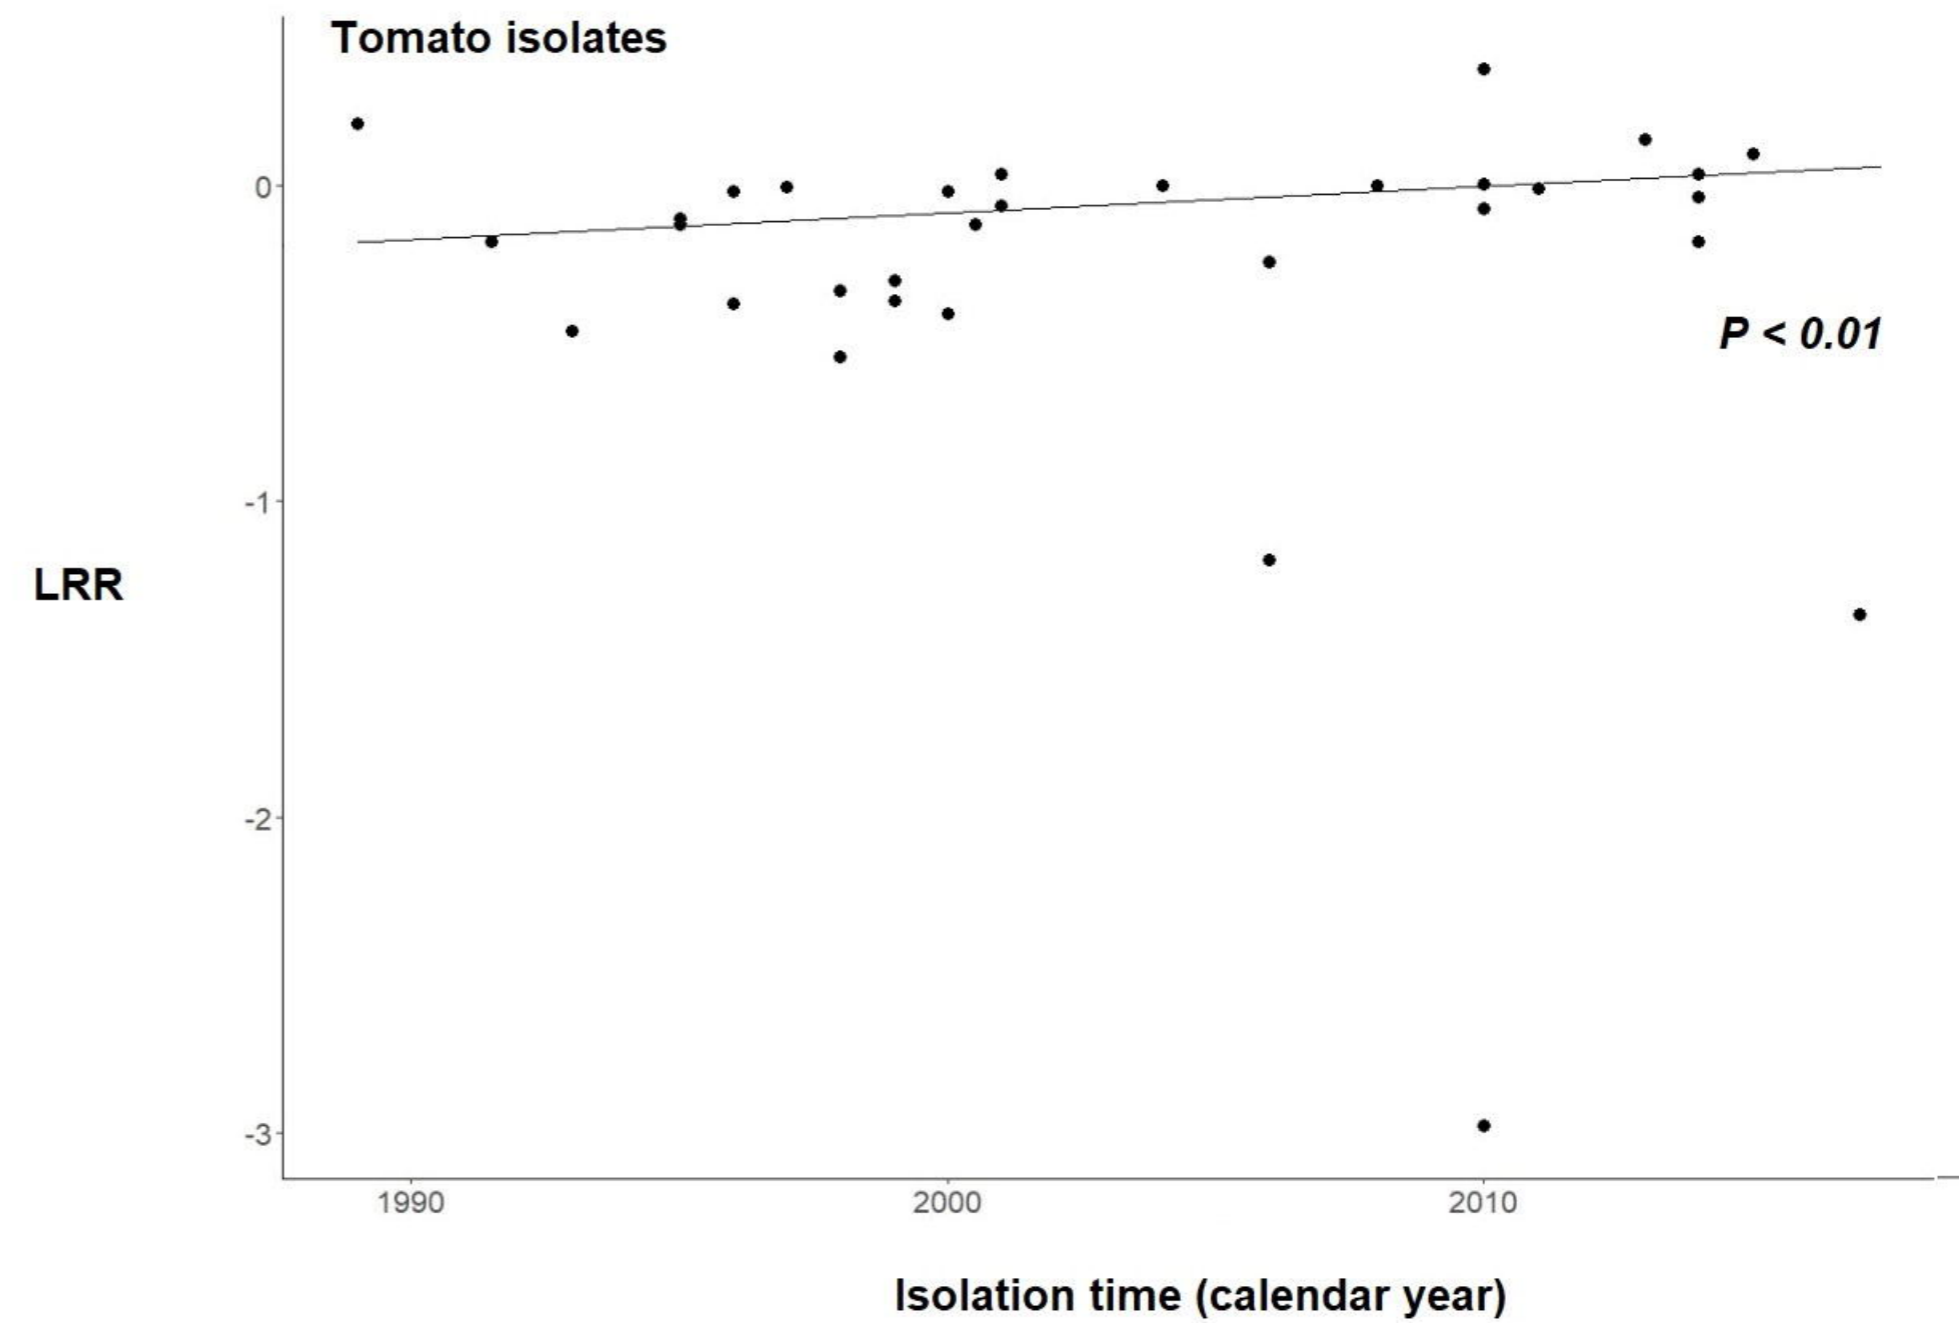

Source: http://biorxiv.org/content/10.1101/2022.08.01.502405v1.full.pdf
